# Supplementary material
Source: MDPI journal article supplement (https://www.mdpi.com/1999-4907/4/2/296)
Supplement: s1 [file s1]

Supplementary Information

**Table S1.** Project and demographic characteristics.

| **Projects (41)** | **Country** | **Ecosystem** | **Project area size (ha.)** | **Carbon benefits 1 (tCO2e)** | **Local pop. size** | **Without-project land use 2** | **REDD+ type 3** | **Inter-vention type 4** | **Year started 5; valid-ated** | **CCBA Ed. or other social standard** |
| --- | --- | --- | --- | --- | --- | --- | --- | --- | --- | --- |
| **AFRICA (14)** | | | | | | | | | | |
| Humbo Ethiopia Assisted Natural Regeneration Project | Ethiopia | Degraded montane forest, woodland, grassland | 2,728 | 880,296 | 48,893 | - Small-scale activities | Refor., Regen, SFM | CBFM | 2006; 2011 | 1st (Gold) |
| TIST Program in Kenya  (CCB-001) | Kenya | Cropland, grassland | 1,565 | 1,600,000 | 50,023 | - Small-scale activities | Affor., Refor., AF | PES | 2004; 2011 | 2nd |
| Forest Again Kakamega Forest | Kenya | Degraded rainforest | 490 | 425,791 | 250,000 | - Small-scale activities | Refor. | PA + ICDP | 2008; 2009 | 2nd (Gold) |
| The Kasigau Corridor REDD Project | Kenya | Dryland, montane forest; grassland | 30,166 | 2,776712 | 35,000 | - Small-scale activities | REDD; some AF and refor. | ICDP, UCT | 1998; 2009 | 2nd (Gold) |
| Kasigua Corridor REDD Project Phase II – Community Ranches | Kenya | Dryland, montane forest; grassland | 169,741 | 48,000,000 | - | - Small-scale activities | REDD; Refor | CBFM, ICDP, Eco-tourism | 1998; 2011 | 2nd (Gold) |
| TIST Program in Kenya  (CCB-002) | Kenya | Cropland, grassland | 2736 | 2,780,016 | 52,000 | - Small-scale activities | Affor, Refor, AF | PES | 2004; 2011 | 2nd (Gold) |
| Trees of Hope | Malawi | Dry woodlands, cropland | 488 | 99,228 | 665,575 | - Small-scale activities | AF, Affor, SFM | PES, ICDP | 2007; 2011 | Plan Vivo |
| Sofala Community Carbon Project (aka “N’hambita project”) | Mozambique | Dry woodland, forest | 511,392 | 1,111,576 | 27,713 | - Small-scale activities | AF and REDD | PES | 2002; 2010 (CCBA), 2007 (Plan Vivo) | 2nd (Gold); Plan Vivo |

**Table S1.** *Cont.*

| **Projects (41)** | **Country** | **Ecosystem** | **Project area size (ha.)** | **Carbon benefits 1 (tCO2e)** | **Local pop. size** | **Without-project land use 2** | **REDD+ type 3** | **Inter-vention type 4** | **Year started 5; valid-ated** | **CCBA Ed. or other social standard** |
| --- | --- | --- | --- | --- | --- | --- | --- | --- | --- | --- |
| **AFRICA (14)** | | | | | | | | | | |
| Reforestation in Grassland of Uchindile, Kilombero & Mapanda, Mufindi | Tanzania | Degraded grassland | 18,379 | 2,439,184 | 7338 | - Anthropogenic fires | Affor.; some refor. and REDD | ICDP | 1997; 2009 | 1st (Silver) |
| Emiti Nibwo Bulora | Tanzania | Degraded woodland, cropland | 1130 | 89,547 | 8,754 | - Small-scale activities | AF, Refor., Affor. | PES | 1994; 2009 | Plan Vivo |
| Reforestation in Grassland Areas of Idete, Mufindi District, Iringa Region | Tanzania | Grassland | 11,663 | 3,789 | 10,453 | - Anthropogenic fires - Small-scale activities | Affor. | Plantation, Woodlots | 2006; 2011 | 1st (Silver) |
| Kikonda Forest Reserve Reforestation Project | Uganda | Degraded grassland, woodland | 12,182 | 4,211,936 | 12,540 to >20,000 | - Small-scale activities | REDD, Affor., SFM | PA + woodlots | 2002; 2009 | 1st (Silver) |
| Trees for Global Benefits | Uganda | Degraded rainforest, woodland; cropland | - | 900,000 | - | - Small-scale activities | Affor., Refor., AF, REDD | PES | 2003; 2009 | Plan Vivo |
| - Industrial agriculture |
| Kachung Forest Project: Afforestation on Degraded Lands | Uganda | Degraded grassland | 5,243 | 494,049 | 6,000 | - Small-scale activities | Affor, SFM | Plantation, ICDP, Alt Fuels, Woodlots | 2006; 2011 | 2nd |

**Table S1.** *Cont.*

| **Projects (41)** | **Country** | **Ecosystem** | **Project area size (ha.)** | **Carbon benefits 1 (tCO2e)** | **Local pop. size** | **Without-project land use 2** | **REDD+ type 3** | **Inter-vention type 4** | **Year started 5; valid-ated** | **CCBA Ed. or other social standard** |
| --- | --- | --- | --- | --- | --- | --- | --- | --- | --- | --- |
| **ASIA (8)** | | | | | | | | | | |
| Oddar Meanchey REDD Project | Cam-bodia | Evergreen, dry deciduous, mixed forests | 67,853 | 7,100,000 | 45,755 | - Small-scale activities | REDD, Refor. and Regen. | CBFM, ICDP, alt. fuels, health measures | 2004; Undergoing CCBA validation | |
| - Industrial agriculture |
| - Industrial logging |
| - Land speculation/human settlement |
| - Anthropogenic fire |
| Small-scale Reforestation for Landscape Restoration | China | Subtropical grassland, cropland | 468 | 167,547 | 2,108 | - Small-scale activities | Affor., SFM | PES, Plantation | 2007; 2007 | 1st (Gold) –validation expired Jan 29, 2012 |
| Reforestation on Degraded Lands in Northwest Guangxi | China | Degraded subtropical forest | 8,671 | 1,746,158 | 121,703 | - Small-scale activities | Refor., Affor., SFM | PES, Plantation | 2008; 2010 | 1st (Gold) |
| Afforestation and Reforestation on Degraded Lands in Northwest Sichuan | China | Degraded temperate forest | 2,552 | 2168 | Uncertain, but > 12,745 | - Small-scale activities | Refor., Affor., SFM | PES, Plantation | 2007; 2010 | 1st (Gold) |
| Reforestation of degraded land in Chhattisgarh | India | Degraded humid , dry deciduous forests | 5,788 | 10,154 | 10,100 | - Small-scale activities | Affor., SFM | Plantation, alt. fuels | 2002; 2009 | 1st (Gold) |

**Table S1.** *Cont.*

| **Projects (41)** | **Country** | **Ecosystem** | **Project area size (ha.)** | **Carbon benefits 1 (tCO2e)** | **Local pop. size** | **Without-project land use 2** | **REDD+ type 3** | **Inter-vention type 4** | **Year started 5; valid-ated** | **CCBA Ed. or other social standard** |
| --- | --- | --- | --- | --- | --- | --- | --- | --- | --- | --- |
| **ASIA (8)** | | | | | | | | | | |
| April Salumei Sustainable Forest Management Project | Papua New Guinea | Tropical rainforest | 521,000 | 98,441,367 | 7696 | - Industrial logging | REDD | ICDP | 2009; 2011 | 2nd (Gold) |
| - Industrial agriculture |
| Penablanca Sustainable Reforestation | Philip-pines | Grassland; degraded forest, plantation | 2,943 | 366,524 | 6,722 | - Small-scale activities | Refor., AF, REDD | PA with joint mgmt., woodlots and alt. fuel | 2007; 2009 | 2nd (Gold) |
| Forest Carbon Project in Quirino Province, Sierra Madre Biodiversity Corridor, Luzon | Philip-pines | Cropland, degraded grassland | 177 | 41,576 | 19765- 28645 | - Small-scale activities | Refor. and AF | Woodlots, AF | 2002; 2010 | 1st (Gold) |
| **CENTRAL & SOUTH AMERICA (19)** | | | | | | | | | | |
| Boden Creek Ecological Preserve Project | Belize | Degraded rainforest | 4,792 | 1,298,324 | 1,251 | - Small-scale activities | REDD | PA, Eco-tourism | 2007; 2010 | 2nd (Gold) |
| - Industrial agriculture |
| - Industrial logging |
| Noel Kempff Mercado Climate Action Project | Bolivia | Rainforest | 642,184 | 5,838,813 | 1,025 | - Industrial logging | REDD | PA, ICDP, CBFM | 1996; 2005 | Other  non-social |
| - Small-scale activities |

**Table S1.** *Cont.*

| **Projects (41)** | **Country** | **Ecosystem** | **Project area size (ha)** | **Carbon benefits 1 (tCO2e)** | **Local pop. size** | **Without-project land use 2** | **REDD+ type 3** | **Inter-vention type 4** | **Year started 5; valid-ated** | **CCBA Ed. or other social standard** |
| --- | --- | --- | --- | --- | --- | --- | --- | --- | --- | --- |
| **CENTRAL & SOUTH AMERICA (19)** | | | | | | | | | | |
| Carbon Sequestration through Reforestation & Improved Land Use by Smallholders (ArBolivia) | Bolivia | Degraded grassland & cropland | 6000 | 1,260,000 | - | - Small-scale activities | Refor; AF; SFM | PES; woodlots (timber) | 2007;  2011 | Plan Vivo |
| Emas-Taquari Biodiversity Corridor Carbon Project | Brazil | Degraded grassland | 589 | 206,115 | - | - Uncertain | Refor. | Plantation, ICDP | Uncertain; 2010 | 2nd (Gold) |
| The Monte Pascoal-Pau Brasil Ecological Corridor | Brazil | Pasture | Uncertain | 6306 | 7400 | - Small-scale activities | Refor. | Plantation | 2002; 2009 | 1st (Gold) |
| The Juma Sustainable Development Reserve Project in Amazonas | Brazil | Rainforest | 589,613 | 189,767,028 | - | - Small-scale activities | REDD | PA, ICDP, UCT | 2005; 2008 | 1st (Gold) |
| - Industrial agriculture |
| - Industrial cattle ranching |

**Table S1.** *Cont.*

| **Projects (41)** | **Country** | **Ecosystem** | **Project area size (ha.)** | **Carbon benefits 1 (tCO2e)** | **Local pop. size** | **Without-project land use 2** | **REDD+ type 3** | **Inter-vention type 4** | **Year started 5; valid-ated** | **CCBA Ed. or other social standard** |
| --- | --- | --- | --- | --- | --- | --- | --- | --- | --- | --- |
| **CENTRAL & SOUTH AMERICA (19)** | | | | | | | | | | |
| Surui Carbon Project | Brazil | Rainforest | 31,994 | 7,258,352 | 1231 | - Small-scale activities | REDD | CBFM | 2007;  2012 | 2nd (Gold) |
| - Industrial agriculture |
| - Industrial cattle ranching |
| Restoration of degraded areas and reforestation in Caceres & Cravo Norte | Columbia | Degraded grassland | 10,870 | 2,300,000 | - | - Industrial cattle ranching | Affor | Plantation | 2002; 2011 | 2nd |
| - Gold mining |
| - Anthropogenic fire |
| Avoided Deforestation through PES in Central Volcanic Mountain Range | Costa Rica | Rainforest | 39,522 | 2,276,526 | 174,806 | - Uncertain | REDD | PES | 2009; 2009 | 1st (Gold) |
| Avoided Deforestation in the Coffee Forest | El Salvador | Humid tropical agroforest | 160,945 | 6,023,466 | - | - Small-scale activities | REDD, AF | PES | 2002; 2010 | 1st |
| Scolel Te | Mexico | Rainforest, degraded pine forest, cropland, pasture | 9,645 | 10,000,000 | - | - Small-scale activities | AF, Affor, Refor, REDD | PES, Alt. fuels | 1996; 1996 | Plan Vivo |

**Table S1.** *Cont.*

| **Projects (41)** | **Country** | **Ecosystem** | **Project area size (ha.)** | **Carbon benefits 1 (tCO2e)** | **Local pop. size** | **Without-project land use 2** | **REDD+ type 3** | **Inter-vention type 4** | **Year started 5; valid-ated** | **CCBA Ed. or other social standard** |
| --- | --- | --- | --- | --- | --- | --- | --- | --- | --- | --- |
| **CENTRAL & SOUTH AMERICA (19)** | | | | | | | | | | |
| Carbon Sequestration in Communities of Extreme Poverty in the Sierra Gorda | Mexico | Deforested temperate & tropical forests | 306 | 100,134 | 20,251 | - Anthropogenic fires | Refor, SFM | PES | 1987; 2011 | 2nd (Gold) |
| - Small-scale activities |
| Return to Forest | Nicaragua | Humid, dry forests, abandoned pasture | 406 | 170,567 | - | - Small-scale activities | Refor. | ICDP,  Eco-tourism | ; 2008 | 1st (Gold) |
| - Industrial cattle ranching |
| - Conservation |
| Limay Community Carbon | Nicaragua | Degraded forest, pasture | 42 | 83,472 | 9,787 | - Small-scale activities | Refor. | PES, Alt. fuels | 2007; 2011 | Plan Vivo |
| CO2OL Tropical Mix Reforestation Project | Panama | Grassland, rainforest | 399 | 31,676 | 1800 | - Small-scale activities | Refor. | Plantation | 2007; 2011 | 2nd – withdrawn and resubmitted as new project after validation |
| Panama Native Species Reforestation | Panama | Abandoned pasture | 800 | 881,370 | 3,898 | - Abandoned pasture | Refor. | Plantation | 2006; 2007 | 1st (Gold) – validation expired Feb 29, 2012 |

**Table S1.** *Cont.*

| **Projects (41)** | **Country** | **Ecosystem** | **Project area size (ha.)** | **Carbon benefits 1 (tCO2e)** | **Local pop. size** | **Without-project land use 2** | **REDD+ type 3** | **Inter-vention type 4** | **Year started 5; valid-ated** | **CCBA Ed. or other social standard** |
| --- | --- | --- | --- | --- | --- | --- | --- | --- | --- | --- |
| **CENTRAL & SOUTH AMERICA (19)** | | | | | | | | | | |
| The Paraguay Forest Conservation Project | Paraguay | Degraded rainforest | 69,304 | 120,490 | - | - Small-scale activities | REDD | PES; improved ag; | 2009; 2010 | 2nd (Gold) |
| Madre de Dios Amazon REDD Project | Peru | Rainforest | 98,932 | 3,622,607 | 6,792 | - Small-scale activities and human settlement | REDD, SFM | Timber concession | 2006; 2009 | 1st (Gold) |
| - Illegal logging |
| - Anthropogenic fire |
| Reforestation with Native Commercial Species on Degraded Lands for Timber and Carbon in Campo Verde, Ucayali | Peru | Degraded rainforest | - | 5,099,115 | ~3344 | - Abandoned pasture | Refor. | Plantation | 2010; 2010 | 1st (Gold) |
| - Small-scale activities |

1 Total tCO2e to be avoided or removed over the project lifetime, which varies from 20-100 years (most 20-30 years); 2 Small-scale activities include all or some of the following: agriculture; harvesting wood for fuel, construction, other needs; grazing; mining; 3 REDD+ types abbreviated as follows: Afforestation (Affor.), Agroforestry (AF), Assisted Regeneration (Regen.), Reducing deforestation and/or degradation (REDD), Reforestation (Refor.), Sustainable Forest Management (SFM); 4 Project intervention types abbreviated as follows: Alternative Fuels (Alt. Fuels), Community-based Forest Management (CBFM), Eco-tourism, Integrated Conservation and Development Project (ICDP), Payments for Ecosystem Services (PES), Plantation, Protected Area (PA), Unconditional Cash Transfer (UCT), Woodlots; 5 Project start date indicates commencement of forest management and community development activities and not the beginning of the carbon crediting period.

**Table S2.** Security.

| **Project** | **Land ownership or mgmt. rights** | | **Project’s effect on local population’s access & use 2** | **Who are carbon rights assigned to?** | **Project contributions to health services** |
| --- | --- | --- | --- | --- | --- |
| **Pre-project tenure** | **Project’s effect on local population’s tenure 1** |
| **AFRICA** | | | | | |
| Humbo Ethiopia Assisted Natural Regeneration Project | State property | Enhancing: Helped communities obtain user right certificates to their land | Sustainable use; effects on migration and resettlement uncertain | Local population | NR3 |
| TIST Program in Kenya (CCB-001) | Communal property; individual property | No change | Sustainable use | Project developer | HIV/AIDS, malaria, and nutrition educ. |
| Forest Again Kakamega Forest | State property with joint community forest management of non-timber resources | No change | Sustainable use | 40% to project developer; 40% to communal forest association; 20% to state | NR |
| The Kasigau Corridor REDD Project | Communal property; Communal properties being subdivided into individual properties | Enhancing: Sold some of ranch to farmer cooperative | Some pre-project use restricted; Aims to avoid in-migration of 62,251 people by 2026 | Uncertain | NR |
| Kasigua Corridor REDD Project Phase II – Community Ranches | Communal property | No change | Sustainable use; in-migration prevented | Uncertain | NR |
| TIST Program in Kenya (CCB-002) | Individual property | No change | Sustainable use | Local population (TIST small groups) | HIV/AIDS, malaria, nutrition, and food security educ. |
| Trees of Hope | Individual property with customary communal oversight | No change | Sustainable use | Local population | NR |
| Sofala Community Carbon Project (aka “N’hambita project”) | State property with communities and individuals possessing or establishing formal mgmt. rights | Enhancing: Helping communities and individuals legally formalize their tenure | Sustainable use in most areas; In REDD zone in-migration prevented and uncertain if  pre-project use restricted | Uncertain: project seeking legal opinion on population’s carbon rights | NR |

**Table S2.** *Cont.*

| **Project** | **Land ownership or mgmt. rights** | | **Project’s effect on local population’s access & use 2** | **Who are carbon rights assigned to?** | **Project contributions to health services** |
| --- | --- | --- | --- | --- | --- |
| **Pre-project tenure** | **Project’s effect on local population’s tenure 1** |
| **AFRICA** | | | | | |
| Reforestation in Grassland of Uchindile, Kilombero & Mapanda, Mufindi | State property leased to private concession | No change | Some pre-project use restricted; “Limited number” resettled and compensated | Uncertain | Medical support worth 174 million Tsh to clinics; STD education |
| Emiti Nibwo Bulora | Individuals beginning process of establishing property rights to customary land | Enhancing: Encouraging land titling processes | Sustainable use | Uncertain | NR |
| Reforestation in Grassland Areas of Idete, Mufindi District, Iringa Region | Communal property | No change | Resettlement: 8 families practicing farming (but not living) in project area were compensated and aided in finding new farmland nearby | Uncertain | Renovated clinic |
| Kikonda Forest Reserve Reforestation Project | State property | No change | Pre-project use restricted; Preventing in-migration | Uncertain | Medical support |
| Trees for Global Benefits | State property with communities possessing joint forest management rights; individual property; communal property | Enhancing: Helping communities legally establish community forests | Sustainable use in most areas; Uncertain if pre-project use restricted in joint forest mgmt areas; Effects on resettlement and in-migration in REDD areas uncertain | Uncertain | NR |
| Kachung Forest Project: Afforestation on Degraded Lands | State property | No change: though project reinforcing a prior weakening – individuals were mistakenly granted tenure on land that was a forest reserve and when reserve demarcated this tenure was lost | Pre-project use restricted: cultivation of over 573 ha has stopped, as well as grazing | Project developer | NR |

**Table S2.** *Cont.*

| **Project** | **Land ownership or mgmt. rights** | | **Project’s effect on local population’s access & use 2** | **Who are carbon rights assigned to?** | **Project contributions to health services** |
| --- | --- | --- | --- | --- | --- |
| **Pre-project tenure** | **Project’s effect on local population’s tenure 1** |
| **ASIA** | | | | | |
| Oddar Meanchey | State property, but contested | Enhancing: Helped communities obtain community forest mgmt. rights | Sustainable use; Preventing in-migration | State | NR |
| Small-scale Reforestation for Landscape Restoration | Communal property; state property | No change | Resettlement: found alternative land for grazers | Project developer | NR |
| Reforestation on Degraded Lands in Northwest Guangxi | Communal property; state property; individual property | No change | Sustainable use; Possibly restricted use for some | Project developer | NR |
| Afforestation and Reforestation on Degraded Lands in Northwest Sichuan | Communal property; state property; individual property | No change | Sustainable use; Possibly restricted use for some | Uncertain | NR |
| Reforestation of degraded land in Chhattisgarh | Individual property | No change | Sustainable use | Uncertain | Reduced water logged areas may be reducing spread of vector borne diseases |
| April Salumei Sustainable Forest Management Project | Communal property | No change | Uncertain | Uncertain | NR |
| Penablanca Sustainable Reforestation | State property with individuals and communities possessing mgmt. rights over 22% | Enhancing: Helping farmers obtain legal title to their lands | Sustainable use | Uncertain | NR |

**Table S2.** *Cont.*

| **Project** | **Land ownership or mgmt. rights** | | **Project’s effect on local population’s access & use 2** | **Who are carbon rights assigned to?** | **Project contributions to health services** |
| --- | --- | --- | --- | --- | --- |
| **Pre-project tenure** | **Project’s effect on local population’s tenure 1** |
| **ASIA** | | | | | |
| Forest Carbon Project in Quirino Province, Sierra Madre Biodiversity Corridor, Luzon | State property with individuals possessing mgmt. rights or short-term, renewable tenure rights | Enhancing: Helping communities maintain and renew their tenure rights by helping them comply with the requirement that 20% of the land be forested | Sustainable use | Uncertain | NR |
| **CENTRAL AND SOUTH AMERICA** | | | | | |
| Boden Creek Ecological Preserve Project | Private nature reserve | No change | Some pre-project use restricted; Preventing in-migration | Project developer | NR |
| Noel Kempff | State-owned logging concessions | Enhancing: Helped population establish, delimit, and title a 360,565 ha Indigenous Territory, which includes community forestry concession | Pre-project use restricted; Sustainable use in Indigenous Territory | 51% to corporate investors; 49% to state | Refurbished 2 medical clinics; funded medicines, ambulances, doctor salary; donated wells and pumps; trained nurses, health education |
| Carbon Sequestration through Reforestation & Improved Land Use by Smallholders (ArBolivia) | Individual property; communal property | Enhancing: developing/documenting Land Use Plans for each property bolsters their land titles | Sustainable use | Proponents and participants | NR |
| Emas-Taquari Biodiversity Corridor Carbon Project | Uncertain | Uncertain | Uncertain | Uncertain | NR |

**Table S2.** *Cont.*

| **Project** | **Land ownership or mgmt. rights** | | **Project’s effect on local population’s access & use 2** | **Who are carbon rights assigned to?** | **Project contributions to health services** |
| --- | --- | --- | --- | --- | --- |
| **Pre-project tenure** | **Project’s effect on local population’s tenure 1** |
| **CENTRAL AND SOUTH AMERICA** | | | | | |
| The Monte  Pascoal-Pau Brasil Ecological Corridor | Individual private property | No change | Uncertain | Project developer | NR |
| The Juma Sustainable Development Reserve Project in Amazonas | State property zoned as a Sustainable Development Reserve, home to some traditional communities | No change | Sustainable use; Preventing  in-migration | Uncertain | NR |
| Surui Carbon Project | State property zoned as a Indigenous Reserve, with communities possessing management rights | No change | Sustainable use; Preventing  in-migration | Surui community | NR |
| Restoration of degraded areas and reforestation in Caceres & Cravo Norte | Private property and some squatters on abandoned land | Enhancing: squatters on land for 10 years have rights, which were respected – individuals given choice to stay or to leave in exchange for compensation | Sustainable use | Uncertain | Health and nutrition educ. |
| Avoided Deforestation through PES in Central Volcanic Mountain Range | Individual property | No change | Sustainable use | State | NR |
| Avoided Deforestation in the Coffee Forest | Individual and communal property | No change | Sustainable use | Project developer | NR |
| Scolel Te | Individual and communal property | No change | Sustainable use; Effects on in-migration and resettlement in REDD area uncertain | Local population | NR |

**Table S2.** *Cont.*

| **Project** | **Land ownership or mgmt. rights** | | **Project’s effect on local population’s access & use 2** | **Who are carbon rights assigned to?** | **Project contributions to health services** |
| --- | --- | --- | --- | --- | --- |
| **Pre-project tenure** | **Project’s effect on local population’s tenure 1** |
| **CENTRAL AND SOUTH AMERICA** | | | | | |
| Carbon Sequestration in Communities of Extreme Poverty in the Sierra Gorda | State property (biosphere reserve), communal property, individual property | No change | Sustainable use | Project developer | NR |
| Return to Forest | Individual property; untenured homesteads | No change | Sustainable use | Uncertain | NR |
| Limay Community Carbon | Individual property | No change | Uncertain | Uncertain | NR |
| CO2OL Tropical Mix Reforestation Project | Individual property | No change | Pre-project use restricted | Project developer | NR |
| Panama Native Species Reforestation | Individual property | No change | Sustainable use | Uncertain | NR |
| The Paraguay Forest Conservation Project | Individual and communal property; confusion about National Park status on some non-titled, inhabited lands | Enhancing: Sought legal opinions, which clarified people’s land claims and found the park not valid | Sustainable use | Project developer | NR |

**Table S2.** *Cont.*

| **Project** | **Land ownership or mgmt. rights** | | **Project’s effect on local population’s access & use 2** | **Who are carbon rights assigned to?** | **Project contributions to health services** |
| --- | --- | --- | --- | --- | --- |
| **Pre-project tenure** | **Project’s effect on local population’s tenure 1** |
| **CENTRAL AND SOUTH AMERICA** | | | | | |
| Madre de Dios Amazon REDD Project | State- owned logging concessions | No change | Possibly restricted use for some; in-migration prevented | Concessionaires | NR |
| Reforestation with Native Commercial Species on Degraded Lands for Timber and Carbon in Campo Verde, Ucayali | Corporate property | No change | Sustainable use | Uncertain | NR |

1 Scored as either “Enhancing,” “Weakening,” “No change,” or “Uncertain”; 2 Scored as “Sustainable use,” “Pre-project use restricted,” “Resettlement,” “In-migration prevented,” and “Uncertain.” “Sustainable use” indicates that population’s ex-ante access and use of land is altered in an attempt to be more sustainable. “Pre-project use restricted”indicates that plans for users to engage in alternative, sustainable use are not mentioned. Projects receive multiple codes where sub-populations experiencing different outcomes; 3 Too early in project lifecycle/not yet reported.

**Table S3.** Empowerment 1.

| **Project** | **Participation →** | | | | | | |
| --- | --- | --- | --- | --- | --- | --- | --- |
| **Not consulted** | **Consulted** | **Consulted and participating in implementation** | **Consulted, participating in implementation, influencing design** | **Grantor of FPIC** | **Grantor of FPIC; managing w/ state, NGO, or other parties** | **Initiated and managing (complete autonomy in rulemaking)** |
| **AFRICA** | | | | | | | |
| Humbo Ethiopia Assisted Natural Regeneration Project |  |  |  |  |  | X |  |
| TIST Program in Kenya  (CCB-001) |  |  |  |  |  | X |  |
| Forest Again Kakamega Forest |  |  | X |  |  |  |  |
| The Kasigau Corridor REDD Project |  |  | X |  |  |  |  |

**Table S3.** *Cont.*

| **Project** | **Participation →** | | | | | | |
| --- | --- | --- | --- | --- | --- | --- | --- |
| **Not consulted** | **Consulted** | **Consulted and participating in implementation** | **Consulted, participating in implementation, influencing design** | **Grantor of FPIC** | **Grantor of FPIC; managing w/ state, NGO, or other parties** | **Initiated and managing (complete autonomy in rulemaking)** |
| **AFRICA** | | | | | | | |
| Kasigua Corridor REDD Project Phase II – Community Ranches |  |  |  |  | X |  |  |
| TIST Program in Kenya  (CCB-002) |  |  |  |  | X |  |  |
| Trees of Hope |  |  |  |  | X |  |  |
| Sofala Community Carbon Project (aka “N’hambita project”) |  |  |  |  |  | X |  |
| Reforestation in Grassland of Uchindile, Kilombero & Mapanda, Mufindi |  |  |  | X |  |  |  |
| Emiti Nibwo Bulora |  |  |  |  |  | X |  |
| Reforestation in Grassland Areas of Idete, Mufindi District, Iringa Region |  |  |  |  | X |  |  |
| Kikonda Forest Reserve Reforestation Project |  |  | X |  |  |  |  |
| Trees for Global Benefits |  |  |  |  |  | X |  |
| Kachung Forest Project: Afforestation on Degraded Lands |  |  | X |  |  |  |  |
| **ASIA** | | | | | | | |
| Oddar Meanchey |  |  |  |  |  | X |  |
| Small-scale Reforestation for Landscape Restoration |  |  |  |  |  | X |  |
| Reforestation on Degraded Lands in Northwest Guangxi |  |  |  |  |  | X |  |

**Table S3.** *Cont.*

| **Project** | **Participation →** | | | | | | |
| --- | --- | --- | --- | --- | --- | --- | --- |
| **Not consulted** | **Consulted** | **Consulted and participating in implementation** | **Consulted, participating in implementation, influencing design** | **Grantor of FPIC** | **Grantor of FPIC; managing w/ state, NGO, or other parties** | **Initiated and managing (complete autonomy in rulemaking)** |
| **ASIA** | | | | | | | |
| Afforestation and Reforestation on Degraded Lands in Northwest Sichuan |  |  |  |  |  | X |  |
| Reforestation of degraded land in Chhattisgarh |  |  | X |  |  |  |  |
| April Salumei Sustainable Forest Management Project |  |  |  |  | X |  |  |
| Penablanca Sustainable Reforestation |  |  |  |  |  | X |  |
| Forest Carbon Project in Quirino Province, Sierra Madre Biodiversity Corridor, Luzon |  |  | X |  |  |  |  |
| **CENTRAL AND SOUTH AMERICA** | | | | | | | |
| Boden Creek Ecological Preserve Project |  |  | X |  |  |  |  |
| Noel Kempff 2 |  |  |  | X |  |  |  |
| Carbon Sequestration through Reforestation & Improved Land Use by Smallholders (ArBolivia) |  |  |  |  | X |  |  |
| Emas-Taquari Biodiversity Corridor Carbon Project | Uncertain | | | | | | |
| The Monte Pascoal-Pau Brasil Ecological Corridor |  |  | X |  |  |  |  |
| The Juma Sustainable Development Reserve Project in Amazonas |  |  |  |  |  | X |  |
| Surui Carbon Project |  |  |  |  |  |  | X |

**Table S3.** *Cont.*

| **Project** | **Participation →** | | | | | | |
| --- | --- | --- | --- | --- | --- | --- | --- |
| **Not consulted** | **Consulted** | **Consulted and participating in implementation** | **Consulted, participating in implementation, influencing design** | **Grantor of FPIC** | **Grantor of FPIC; managing w/ state, NGO, or other parties** | **Initiated and managing (complete autonomy in rulemaking)** |
| **CENTRAL AND SOUTH AMERICA** | | | | | | | |
| Restoration of degraded areas and reforestation in Caceres & Cravo Norte |  |  |  |  | X |  |  |
| Avoided Deforestation through PES in Central Volcanic Mountain Range |  |  |  |  |  | X |  |
| Avoided Deforestation in the Coffee Forest |  |  |  |  |  | X |  |
| Scolel Te |  |  |  |  |  | X |  |
| Carbon Sequestration in Communities of Extreme Poverty in the Sierra Gorda |  |  |  |  |  | X |  |
| Return to Forest |  |  | X |  | X |  |  |
| Limay Community Carbon |  |  |  |  |  | X |  |
| CO2OL Tropical Mix Reforestation Project | X |  |  |  | X |  |  |
| Panama Native Species Reforestation | X |  |  |  | X |  |  |
| The Paraguay Forest Conservation Project |  |  |  |  |  | X |  |
| Madre de Dios Amazon REDD Project |  |  |  | X |  |  |  |
| Reforestation with Native Commercial Species on Degraded Lands for Timber and Carbon in Campo Verde, Ucayali |  |  |  |  | X |  |  |

1 Where sub-populations experiencing different outcomes, projects receive multiple scores; 2 Describes current project situation. Initial condition was “no consultation”.

**Table S4.** Project documents reviewed.

| **Project (32)** | **Country** | **Documents reviewed** |
| --- | --- | --- |
| **AFRICA (9)** | | |
| Humbo Ethiopia Assisted  Natural Regeneration Project | Ethiopia | - Clean Development Mechanism Project Design Document Form for Afforestation and Reforestation Project Activities (CDM-AR-PDD) Version 04. Available at Climate, Community, and Biodiversity Alliance (CCBA) website (http://www.climate-standards.org/projects/index.html) |
| TIST Program in Kenya  (CCB-001) | Kenya | Following documents available at CCBA website:   - CCBA Project Description, dated 14 Feb 2011. - CCBA Monitoring Report, dated 14 Feb 2011. - CCBA Monitoring Plan, dated 14 Feb 2011. - CCBA Project Implementation Report, dated 28 April 2011. |
| Forest Again Kakamega Forest | Kenya | Following documents available at CCBA website:   - CCBA Project Design Document (PDD). - Community Study for Forest Again. By Mark Lung. |
| The Kasigau Corridor REDD  Project Phase I – Rukinga  Sanctuary | Kenya | Following documents available at CCBA website:   - CCBA PDD. - CCBA Project Implementation Report (Verification period: 1 Jan-31 Dec, 2010). - Wildlife Works EPZ Community Evaluation, dated Aug 2007. By Marit Rietveld. |
| Kasigua Corridor REDD Project  Phase II – Community Ranches | Kenya | Following documents available at CCBA website:   - CCBA PDD, Version 9, dated 27 April 2011. - Project Implementation Report, Version 4, 10 May 2011. |
| TIST Program in Kenya  (CCB-002) | Kenya | Following documents available at CCBA website:   - CCBA PDD, dated 2 November 2011. - Project Implementation Report, 10 August 2011. |
| Trees of Hope | Malawi | - Plan Vivo PDD, dated 15 August 2011. Available at Plan Vivo website:  http://www.planvivo.org/projects/registeredprojects/trees-of-hope-malawi/ |
| Sofala Community Carbon  Project (aka “N’hambita project”) | Mozambique | - PDD According to CCB and Plan Vivo Standards, dated April 2010. Available at CCBA website. |
| Reforestation in Grassland of  Uchindile, Kilombero &  Mapanda, Mufindi | Tanzania | - CCBA PDD for Afforestation and Reforestation Project Activities (CCB-AR-PDD). Available at CCBA website. |

**Table S4.** *Cont.*

| **Project (32)** | **Country** | **Documents reviewed** |
| --- | --- | --- |
| **AFRICA (9)** | | |
| Emiti Nibwo Bulora | Tanzania | - Plan Vivo PDD, dated 20 May 2010. Available at Plan Vivo website (http://www.planvivo.org/projects/registeredprojects/emiti-nibwo-burola-tanzania/) |
| Reforestation in Grassland Areas of Idete, Mufindi District, Iringa Region | Tanzania | - CCBA PDD, Version 05, dated 18 April 2011. Available at CCBA website. |
| Kikonda Forest Reserve  Reforestation Project | Uganda | - PDD (CFS v2.1 + CCBA v1). Available at CCBA website. |
| Trees for Global Benefits | Uganda | Following documents available at Plan Vivo website (http://www.planvivo.org/projects/registeredprojects/trees-for- global-benefits-uganda/):   - Plan Vivo PDD, no date. - Annual reports for 2003/2004, 2005, 2006, 2007, 2008, 2009, and 2010. |
| Kachung Forest Project:  Afforestation on Degraded  Lands | Uganda | - CCBA PDD, Version 02. Available at CCBA website. |
| **ASIA (7)** | | |
| Oddar Meanchey REDD Project | Cambodia | - CCBA PDD, Oct 2009. Available at CCBA website. |
| Small-scale Reforestation for  Landscape Restoration | China | - Clean Development Mechanism Project Design Document Form for Small-Scale Afforestation and Reforestation Project Activities (CM-SSC-AR-PDD). Available at CCBA website. |
| Reforestation on Degraded  Lands in Northwest Guangxi | China | The following documents available at the CCBA website:   - CCBA PDD, Version 01. - Project Design Document Form for Afforestation and Reforestation Project Activities (CDM-AR-PDD), Version 04. |
| Afforestation and Reforestation  on Degraded Lands in Northwest  Sichuan | China | The following documents available at the CCBA website:   - CCBA PDD, Version 04. - Project Design Document Form for Afforestation and Reforestation Project Activities (CDM-AR-PDD), Version 06. |
| Reforestation of degraded land  in Chhattisgarh | India | - CCBA PDD. Available at CCBA website. |

**Table S4.** *Cont.*

| **Project (32)** | **Country** | **Documents reviewed** |
| --- | --- | --- |
| **ASIA (7)** | | |
| April Salumei Sustainable  Forest Management Project | Papua New  Guinea | - CCBA PDD, dated June 2011. Available at CCBA website. |
| Penablanca Sustainable  Reforestation | Philippines | - CCBA PDD, Dec 2009. Available at CCBA website. |
| Forest Carbon Project in Quirino  Province, Sierra Madre  Biodiversity Corridor, Luzon | Philippines | - CCBA PDD, May 2010. Available at CCBA website. |
| **CENTRAL AND SOUTH AMERICA (16)** | | |
| Boden Creek Ecological  Preserve Project | Belize | - CCBA PDD, dated 14 July 2010. - CCBA Monitoring Plans, dated 5 Oct 2010. |
| Noel Kempff Mercado Climate  Action Project | Bolivia | - Noel Kempff Mercado Climate Action Project: A Case Study in Reducing Emissions from Deforestation and Degradation. 2009. By The Nature Conservancy. Available at: http://www.conservationgateway.org/sites/default/files/FINAL%20NOEL%20KEMPFF.pdf - Can forest-protection carbon projects improve rural livelihoods? Analysis of the Noel Kempff Mercado Climate Action Project, Bolivia. 2002. In *Mitigation and Adaptation Strategies for Global Change* 7: 323-337. By Nigel M. Asquith, Maria Teresa Vargas Rios, and Joyotee Smith. - Livelihood impact assessment, Final Report. Annex 6 of the PDD, Nov 2005. By Natalia Calderon Angeleri, Fundacion Amigos de la Naturaleza (FAN-Bolivia). |
| Carbon Sequestration through  Reforestation & Improved Land  Use by Smallholders (ArBolivia) | Bolivia | - Plan Vivo PDD, dated April 2011. Available at Plan Vivo website:  http://www.planvivo.org/projects/registeredprojects/arbolivia-bolivia/ |
| Emas-Taquari Biodiversity  Corridor Carbon Project | Brazil | - English language translation of Sections G3.1-3 of Portuguese CCBA PDD. Available at CCBA website. |
| The Monte Pascoal-Pau Brasil  Ecological Corridor | Brazil | The following documents available at CCBA website:   - Programme of Activities Design Document Afforestation/Reforestation Project Activities (Version 01) - Programme Activity Design Document Afforestation/Reforestation Project Activities (Version 01) |

**Table S4.** *Cont.*

| **Project (32)** | **Country** | **Documents reviewed** |
| --- | --- | --- |
| **CENTRAL AND SOUTH AMERICA (16)** | | |
| The Juma Sustainable  Development Reserve Project in  Amazonas | Brazil | - CCBA PDD (Version 5.0), dated 29 Sept 2008. Available at CCBA website. - Amazonas Sustainable Foundation (FAS) website (http://www.fas-amazonas.org/pt/). |
| Surui Carbon Project | Brazil | - Katoomba Incubator Document: Surui: Carbon Finance and the Protection of Indigenous Peoples’ Forests in the Amazon. Available at: http://www.katoombagroup.org/incubator/project.php?id=210 - Project Brochure: Surui Carbono. Available at: http://moderncms.ecosystemmarketplace.com/repository/moderncms_documents/folder_surui.1.1.1.pdf - Avoided Deforestation (REDD) and Indigenous Peoples: Experiences, challenges and opportunities in the Amazon context. Sept 2010. By Instituto Socioambiental and Forest Trends. Available at: http://forestindustries.eu/sites/default/files/userfiles/1file/doc_2626.pdf - Free, Prior and Informed Consent Surui Carbon Project. 2010. Available at:   http://www.forest-trends.org/documents/files/doc_2693.pdf |
| Restoration of degraded areas  and reforestation in Caceres &  Cravo Norte | Colombia | Following documents available at CCBA website:   - CCBA PDD, Version 2, dated 5 July 2011. - CCBA Project Implementation Report, Version 3, dated 24 June 2011. - CCBA Monitoring Plan, Version 1, dated 25 April 2011. - CCBA Monitoring Report, Version 1, dated 25 April 2011. |
| Avoided Deforestation through  PES in Central Volcanic  Mountain Range | Costa Rica | - CCBA PDD. Available at CCBA website. |
| Avoided Deforestation in the  Coffee Forest | El Salvador | - Clean Development Mechanism PDD (Version 03). Available at CCBA website. |
| Scolel Te | Mexico | Following documents available at Plan Vivo website (http://www.planvivo.org/projects/registeredprojects/scolel-te-mexico/):   - Operational Manual - Project Factsheet - Technical Specification documents - Annual Reports for years 2002, 2003, 2004, 2005, 2006, 2007, 2008, 2009 |

**Table S4.** *Cont.*

| **Project (32)** | **Country** | **Documents reviewed** |
| --- | --- | --- |
| **CENTRAL AND SOUTH AMERICA (16)** | | |
| Carbon Sequestration in  Communities of Extreme  Poverty in the Sierra Gorda | Mexico | Following documents available at CCBA website:   - CCBA PDD, dated May 2011. - Clean Development Mechanism PDD for Small-scale Afforestation and Reforestation Project Activities, Version 02. |
| Return to Forest | Nicaragua | - CCBA PDD. Available at CCBA website. |
| Limay Community Carbon | Nicaragua | Following documents available at Plan Vivo website (http://www.planvivo.org/projects/registeredprojects/limay-community-carbon/):   - Plan Vivo PDD (Version TR_PDD_V2011-03-10) - Annual Report for 2010. |
| CO2OL Tropical Mix  Reforestation Project | Panama | - CCBA PDD, dated June 2010. Available at CCBA website. - Carbon Fix website (http://www.carbonfix.info/Project.html?PHPSESSID=3d7p8hcsm2bspbt7t6iggqo515). |
| Panama Native Species  Reforestation | Panama | - CO2OL-USA /Futuro Forestal S.A. Panama CCBA PDD, dated 29 July 2006. Available at CCBA website. |
| The Paraguay Forest  Conservation Project | Paraguay | - CCBA PDD, dated Oct 2010. - Legal review – tenure in San Rafael. Annexe 12a to CCBA PDD, dated 30 June 2009. By Juan Carlos Mendonca Bonnet. - Social Impact of the project for La Amistad and their monitoring. Annexe 19 to CCBA PDD. |
| Madre de Dios Amazon REDD  Project | Peru | The following documents available at CCBA website:   - PDD - Monitoring Report |
| Reforestation with Native  Commercial Species on  Degraded Lands for Timber and  Carbon in Campo Verde,  Ucayali | Peru | - CCBA PDD Version 02. Available at CCBA website. |
